# Supplementary material for: In Vitro Evaluation of Intestinal Transport and High-Density Fermentation of Lactobacillus acidophilus
Source: MDPI journal article supplement (doi:10.3390/metabo13101077), 2023-10-13
Supplement: s1 [file s1]

## TABLES

**Table S1.** Information about *Lactobacillus acidophilus* strains evaluated

| Strain<br>reference | Date of<br>isolation | Region from which strain was<br>isolated | Isolation source        |
|---------------------|----------------------|------------------------------------------|-------------------------|
| IMAU81186           | 2014                 | Hongyuan County, Sichuan<br>Province     | Tibetan horse<br>faeces |
| IMAU81182           | 2014                 | Hongyuan County, Sichuan<br>Province     | Tibetan horse<br>faeces |
| IMAU81183           | 2014                 | Hongyuan County, Sichuan<br>Province     | Tibetan horse<br>faeces |
| IMAU81203           | 2014                 | Hongyuan County, Sichuan<br>Province     | Tibetan horse<br>faeces |
| IMAU81202           | 2014                 | Hongyuan County, Sichuan<br>Province     | Tibetan horse<br>faeces |
| IMAU50370           | 2017                 | Xiangyang of Hubei Province              | Adult faeces            |
| IMAU30066           | 2004                 | Huocheng County, Xinjiang                | Koumiss                 |
| NCFM                | CK                   | Commercial probiotic                     |                         |

**Table S2.** Orthogonal test L16 (34) of static culture conditions

| Number | A                   | B       | C                       | Bacterial<br>density ( $\Delta$<br>OD600nm) |
|--------|---------------------|---------|-------------------------|---------------------------------------------|
|        | Temperature<br>(°C) | pH      | Inoculation<br>quantity |                                             |
| 1      | 1(31 °C)            | 1(5.0)  | 1 (1%)                  | 0.5872                                      |
| 2      | 1                   | 2 (5.5) | 2 (2%)                  | 0.7587                                      |
| 3      | 1                   | 3 (6.0) | 3 (3%)                  | 0.9403                                      |
| 4      | 1                   | 4 (6.5) | 4 (4%)                  | 0.9046                                      |
| 5      | 2 (35 °C)           | 1       | 2                       | 0.8890                                      |
| 6      | 2                   | 2       | 1                       | 0.7975                                      |
| 7      | 2                   | 3       | 4                       | 1.0343                                      |
| 8      | 2                   | 4       | 3                       | 1.2747                                      |
| 9      | 3 (39 °C)           | 1       | 3                       | 0.8823                                      |
| 10     | 3                   | 2       | 4                       | 0.9023                                      |
| 11     | 3                   | 3       | 1                       | 0.9147                                      |
| 12     | 3                   | 4       | 2                       | 1.0206                                      |
| 13     | 4 (43 °C)           | 1       | 4                       | 0.7006                                      |
| 14     | 4                   | 2       | 3                       | 0.7892                                      |

|             |                |                                              |                |        |
|-------------|----------------|----------------------------------------------|----------------|--------|
| 15          | 4              | 3                                            | 2              | 0.8373 |
| 16          | 4              | 4                                            | 1              | 0.8241 |
| K1          | 0.8227         | 0.7648                                       | 0.7809         |        |
| K2          | 0.9989         | 0.8369                                       | 0.8764         |        |
| K3          | 0.9549         | 0.9316                                       | 0.9716         |        |
| K4          | 0.7878         | 1.0060                                       | 0.8855         |        |
| R           | 0.2111         | 0.2412                                       | 0.1907         |        |
| Factor      |                |                                              |                |        |
| arrangemen  |                | B>A>C                                        |                |        |
| t           |                |                                              |                |        |
| Horizontal  |                |                                              |                |        |
| arrangemen  | K2 > K3 > K1 > | K4 > K3 > K2 >                               | K3 > K4 > K2 > |        |
| t           | K4             | K1                                           | K1             |        |
| Excellent   |                |                                              |                |        |
| combination | A2             | B4                                           | C3             |        |
| Excellent   |                |                                              |                |        |
| level       |                | A <sub>2</sub> B <sub>4</sub> C <sub>3</sub> |                |        |

**Table S3.** CCRD design with experimental and predicted cell population of *L. acidophilus* IMAU81186

|        | A             | B               | C           |                     |
|--------|---------------|-----------------|-------------|---------------------|
| Number | carbon source | nitrogen source | Buffer salt | Bacterial density   |
|        | (g/L)         | (g/L)           | (g/L)       | $\Delta OD_{600nm}$ |
| 1      | 1             | 1               | 0           | 8.2342              |
| 2      | 0             | 0               | 0           | 10.8679             |
| 3      | -1            | 0               | 1           | 5.4622              |
| 4      | 1             | 0               | 1           | 7.3651              |
| 5      | 0             | 0               | 0           | 9.9427              |
| 6      | 0             | -1              | 1           | 5.0023              |
| 7      | 1             | 0               | -1          | 6.6244              |
| 8      | 0             | 0               | 0           | 10.9434             |
| 9      | -1            | 0               | -1          | 3.8621              |
| 10     | -1            | -1              | 0           | 3.0154              |
| 11     | 0             | -1              | -1          | 4.3998              |

|    |    |    |    |         |
|----|----|----|----|---------|
| 12 | -1 | 1  | 0  | 6.0093  |
| 13 | 1  | -1 | 0  | 7.9416  |
| 14 | 0  | 0  | 0  | 11.2088 |
| 15 | 0  | 0  | 0  | 10.6548 |
| 16 | 0  | 1  | -1 | 6.383   |
| 17 | 0  | 1  | 1  | 6.9552  |

---

**Table S4.** Coefficients and ANOVA for the developed quadratic polynomial model

| Source         | Sum of Squares | df | Mean square | F value | P-value  |
|----------------|----------------|----|-------------|---------|----------|
| Model          | 109.19         | 9  | 12.13       | 44.36   | < 0.0001 |
| A              | 17.45          | 1  | 17.45       | 63.82   | < 0.0001 |
| B              | 6.52           | 1  | 6.52        | 23.84   | 0.0018   |
| C              | 1.54           | 1  | 1.54        | 5.65    | 0.0491   |
| AB             | 1.82           | 1  | 1.82        | 6.67    | 0.0363   |
| AC             | 0.18           | 1  | 0.18        | 0.68    | 0.4383   |
| BC             | 0.00           | 1  | 0.00        | 0.00    | 0.9777   |
| A <sup>2</sup> | 19.28          | 1  | 19.28       | 70.51   | < 0.0001 |
| B <sup>2</sup> | 21.95          | 1  | 21.95       | 80.28   | < 0.0001 |

|                |                        |    |       |                                       |          |
|----------------|------------------------|----|-------|---------------------------------------|----------|
| C <sup>2</sup> | 31.96                  | 1  | 31.96 | 116.87                                | < 0.0001 |
| Residual       | 1.91                   | 7  | 0.27  |                                       |          |
| Lack of Fit    | 1.00                   | 3  | 0.33  | 1.44                                  | 0.3552   |
| Pure Error     | 0.92                   | 4  | 0.23  |                                       |          |
| Cor Total      | 111.10                 | 16 |       |                                       |          |
|                | R <sup>2</sup> =0.9828 |    |       | R <sub>adj</sub> <sup>2</sup> =0.9606 |          |

---
